# Supplementary material
Source: HighWire-hosted journal article supplement (http://www.cmaj.ca/highwire/filestream/59911/field_highwire_adjunct_files/2/150674-res-3-at.pdf)

**Appendix 3 (as supplied by the authors): Number of ophthalmologists in Ontario, 1994-2013**

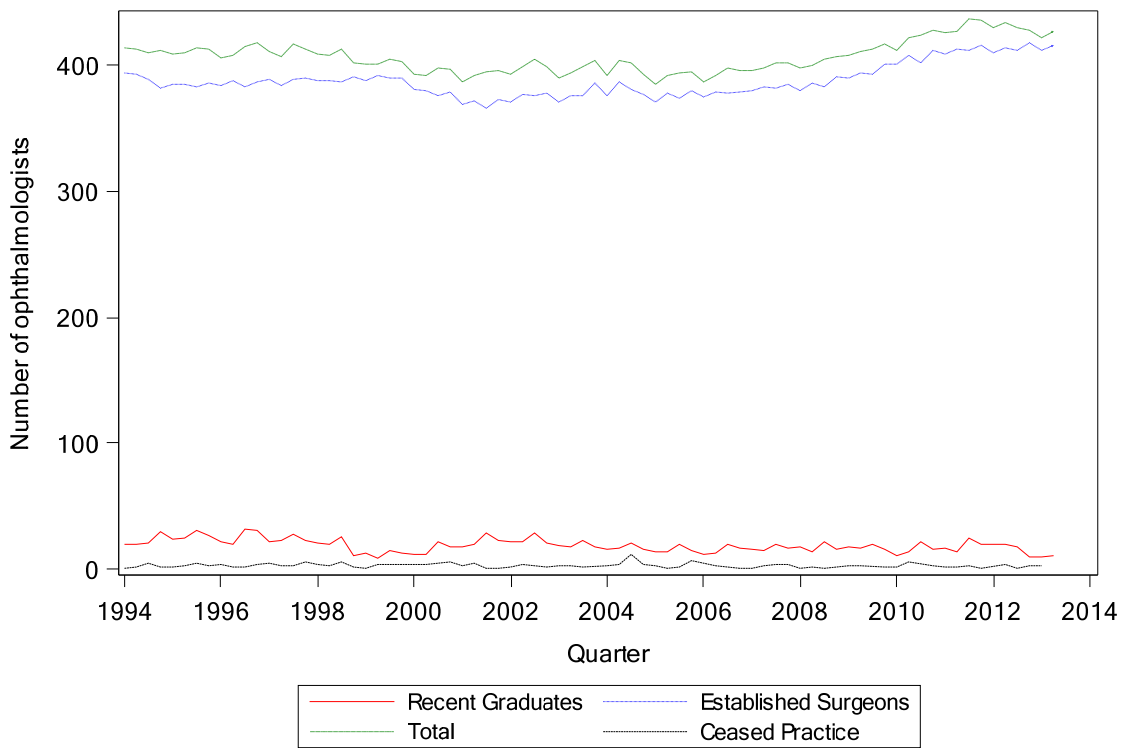

Supplement: 150674-res-3-at.pdf [file 150674-res-3-at.pdf]
